# Supplementary material for: Polymorphic segmental duplication in the nematode Caenorhabditis elegans
Source: PubMed Central journal article supplement (PMC2728738; doi:10.1186/1471-2164-10-329), 2009-07-21

a

I

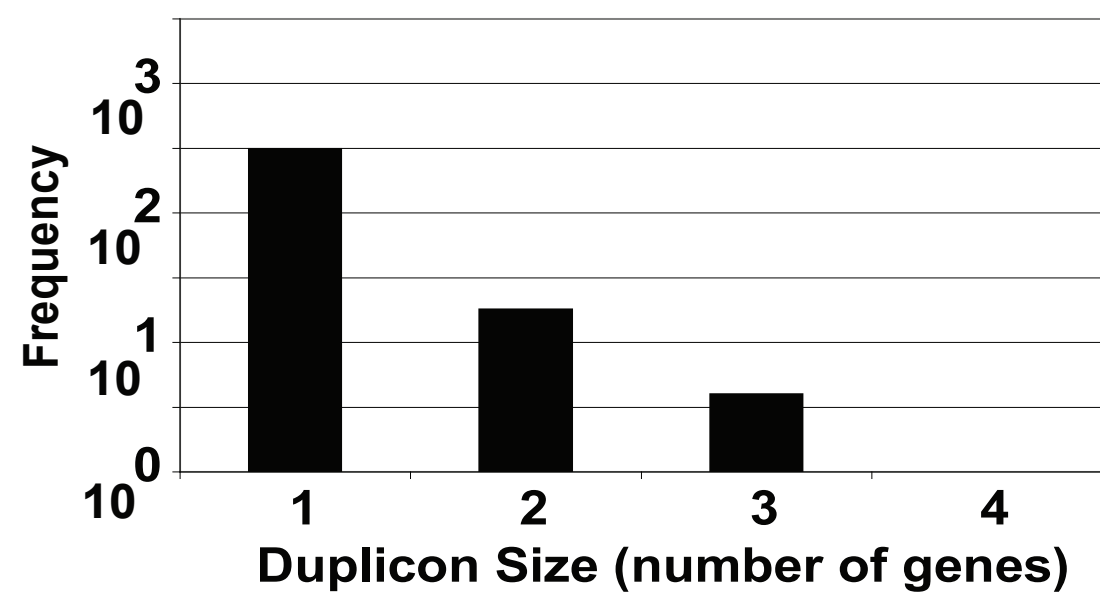

II

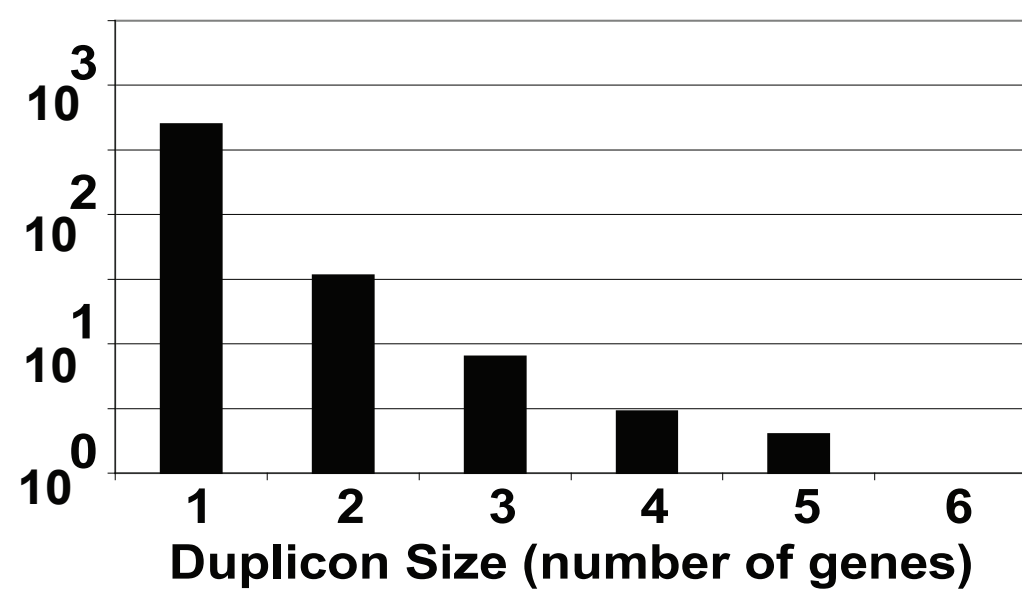

III

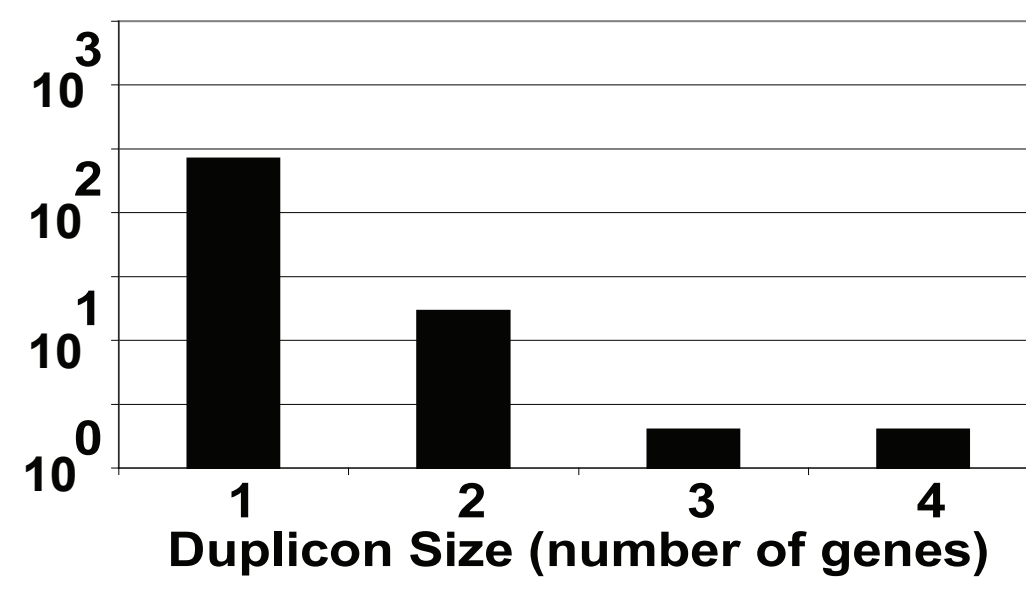

IV

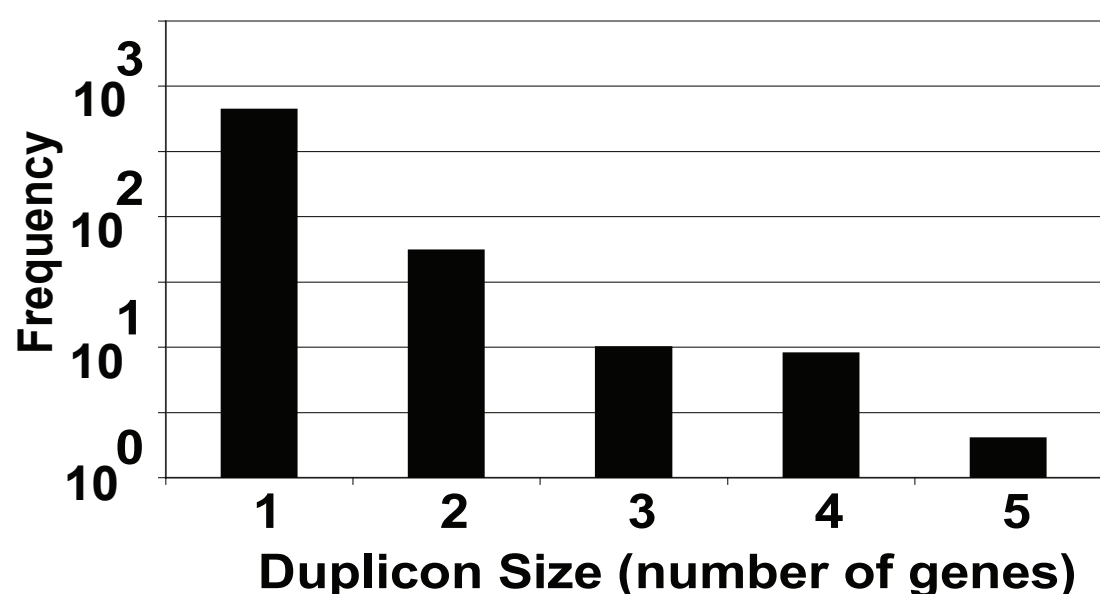

V

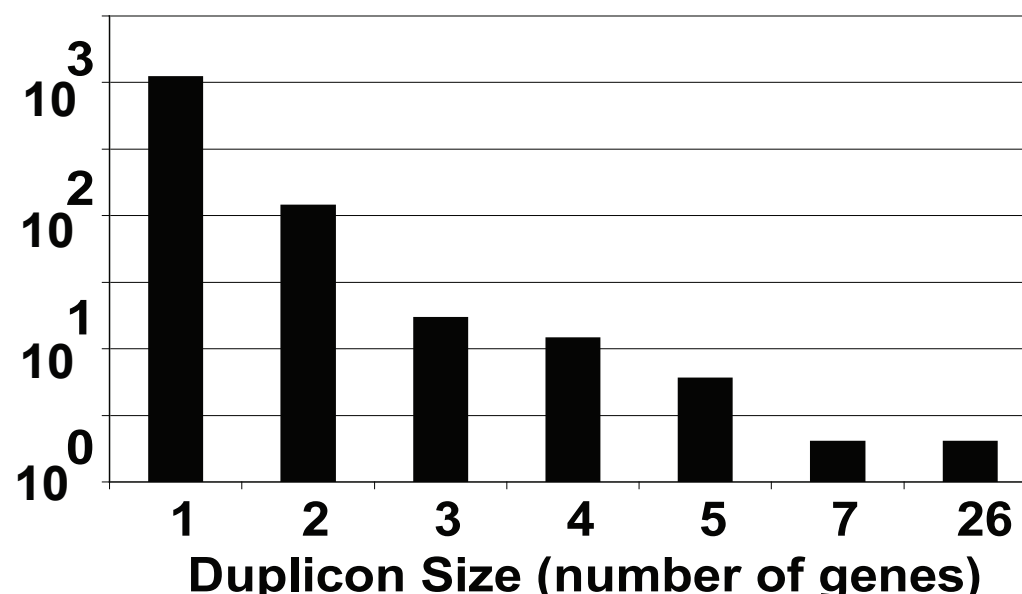

X

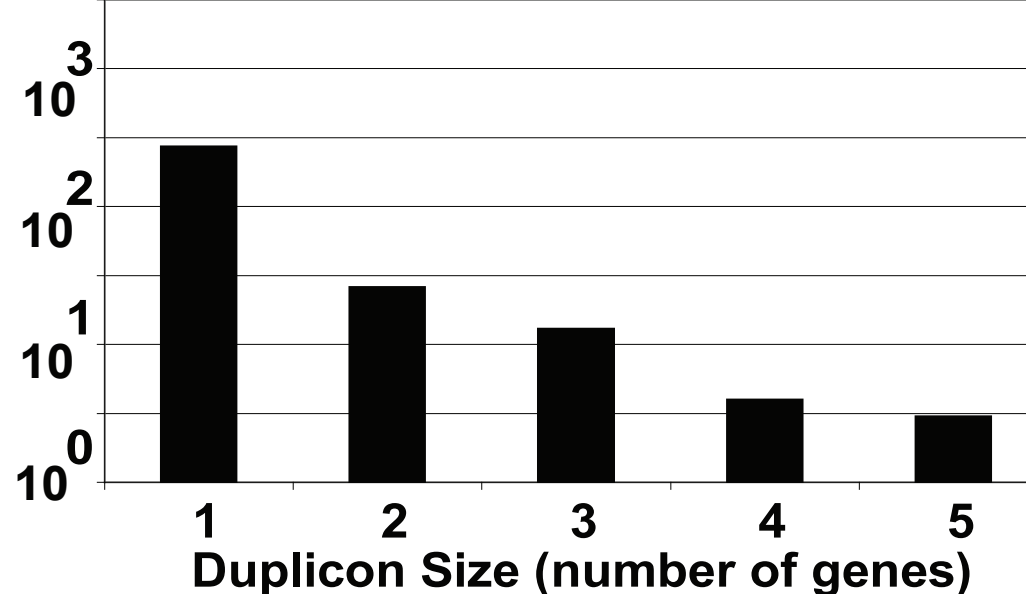

b

I

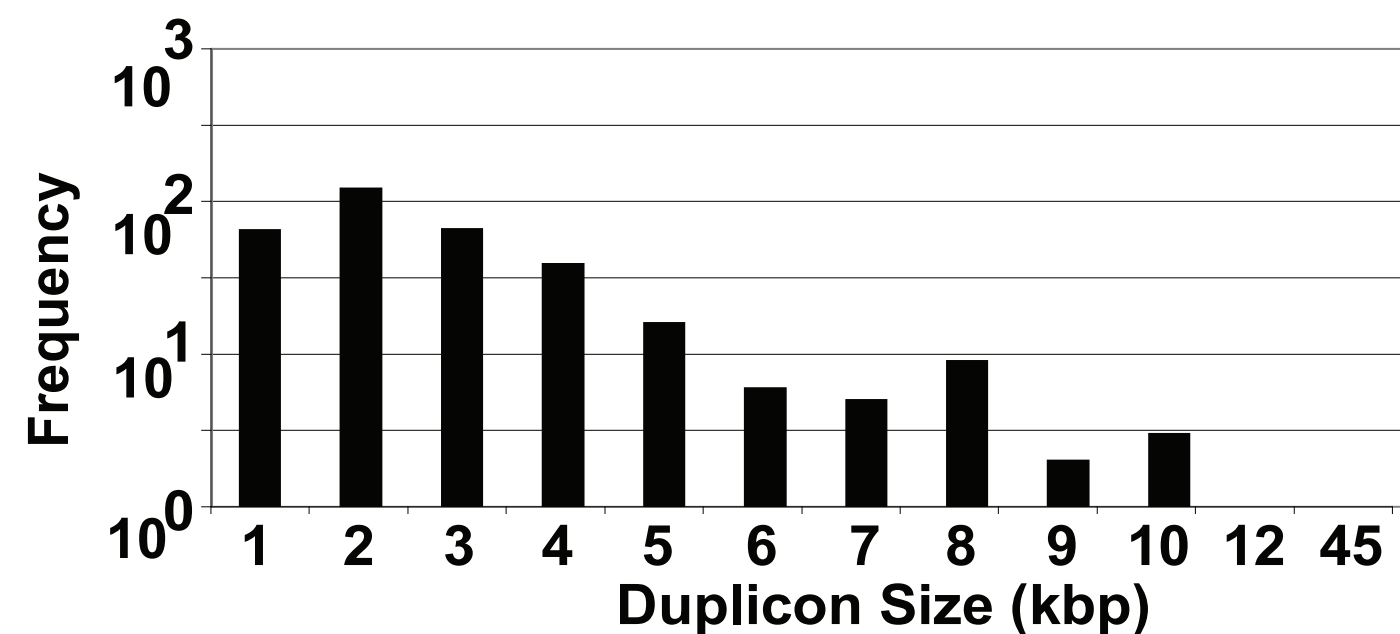

II

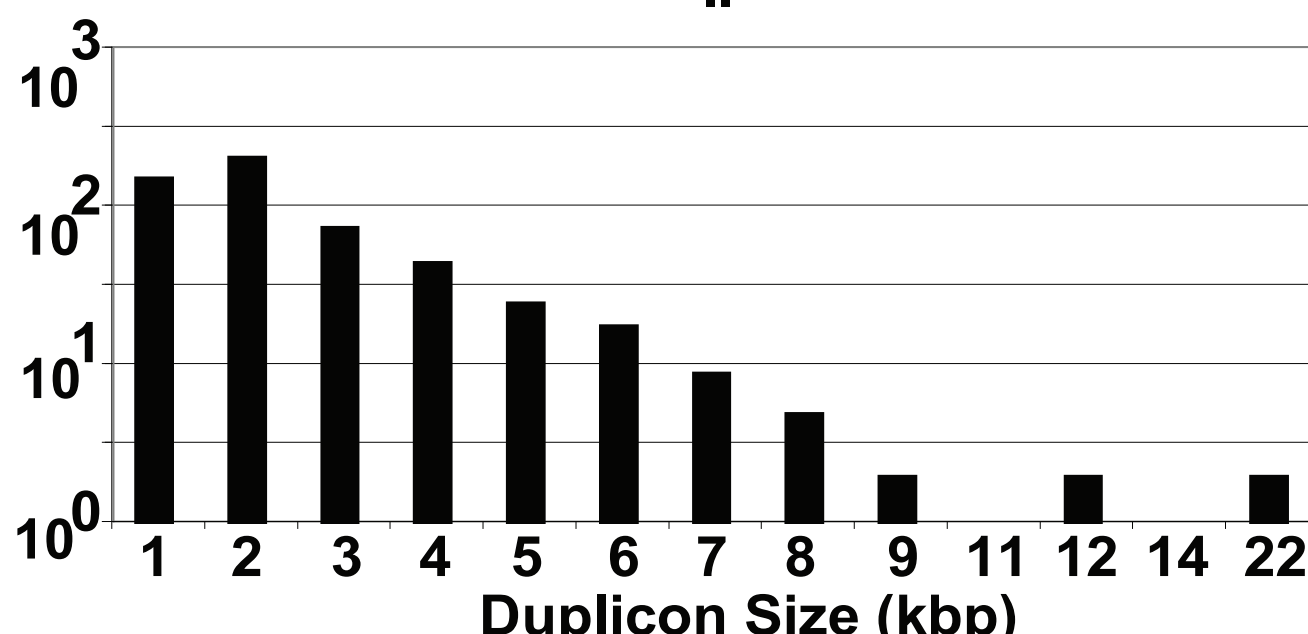

III

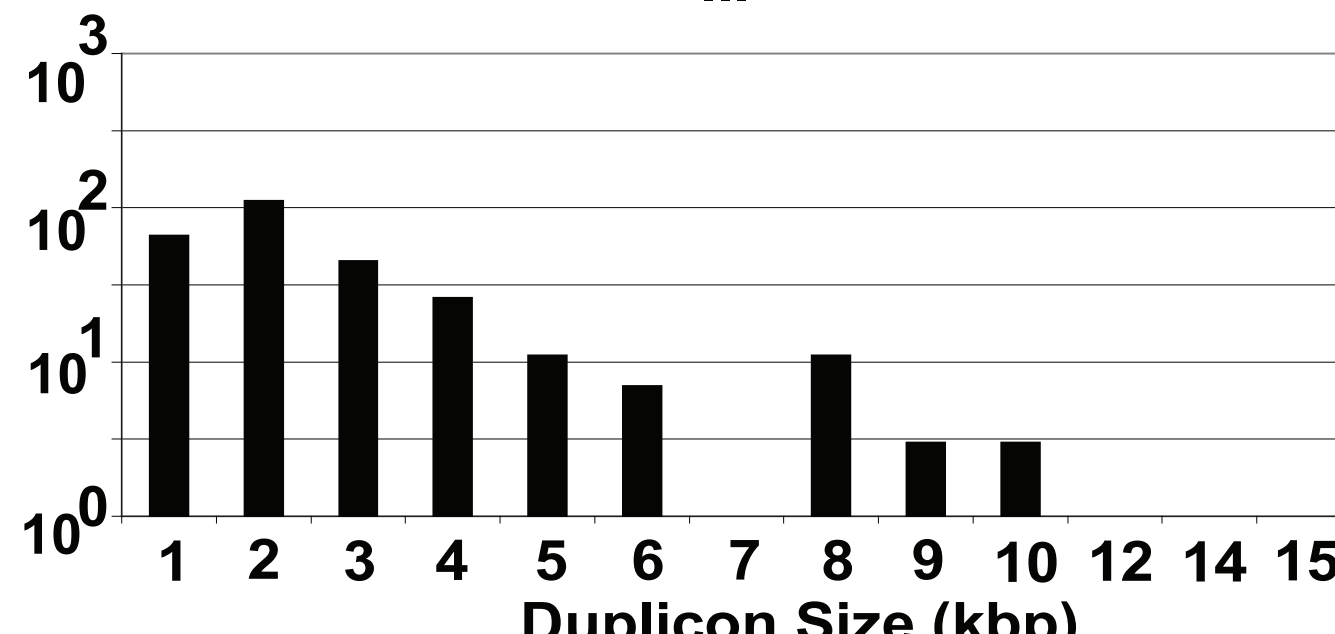

IV

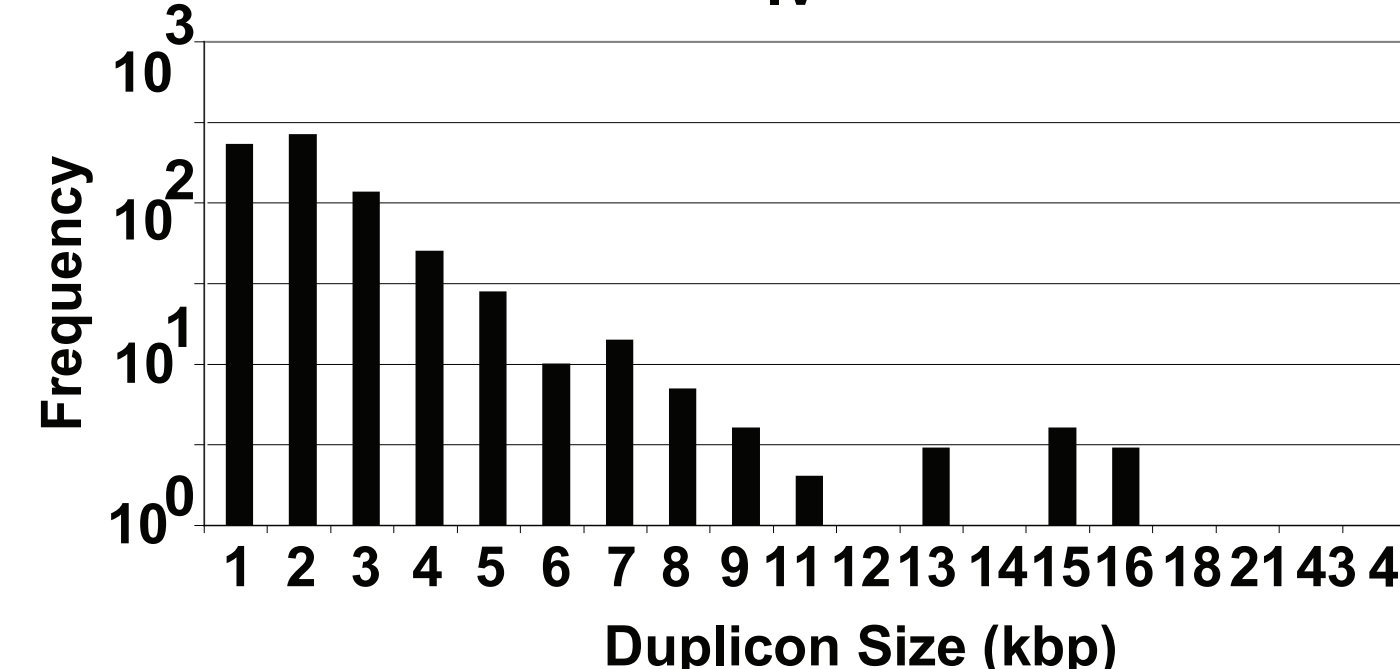

V

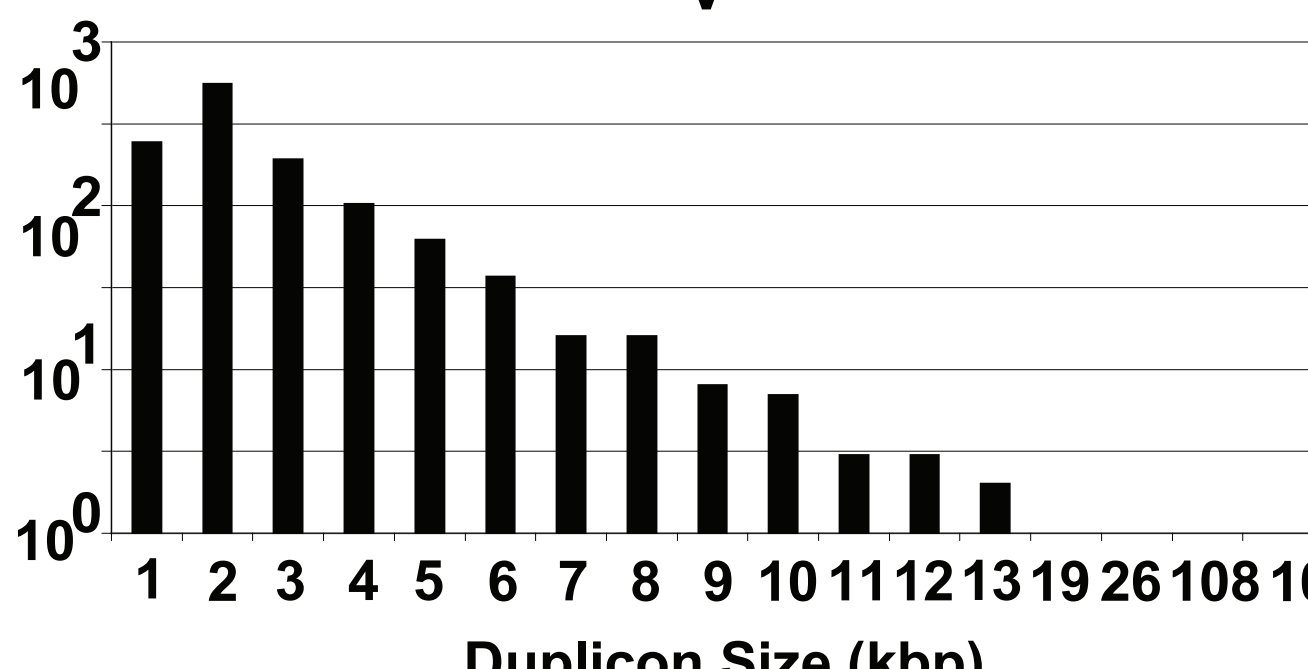

X

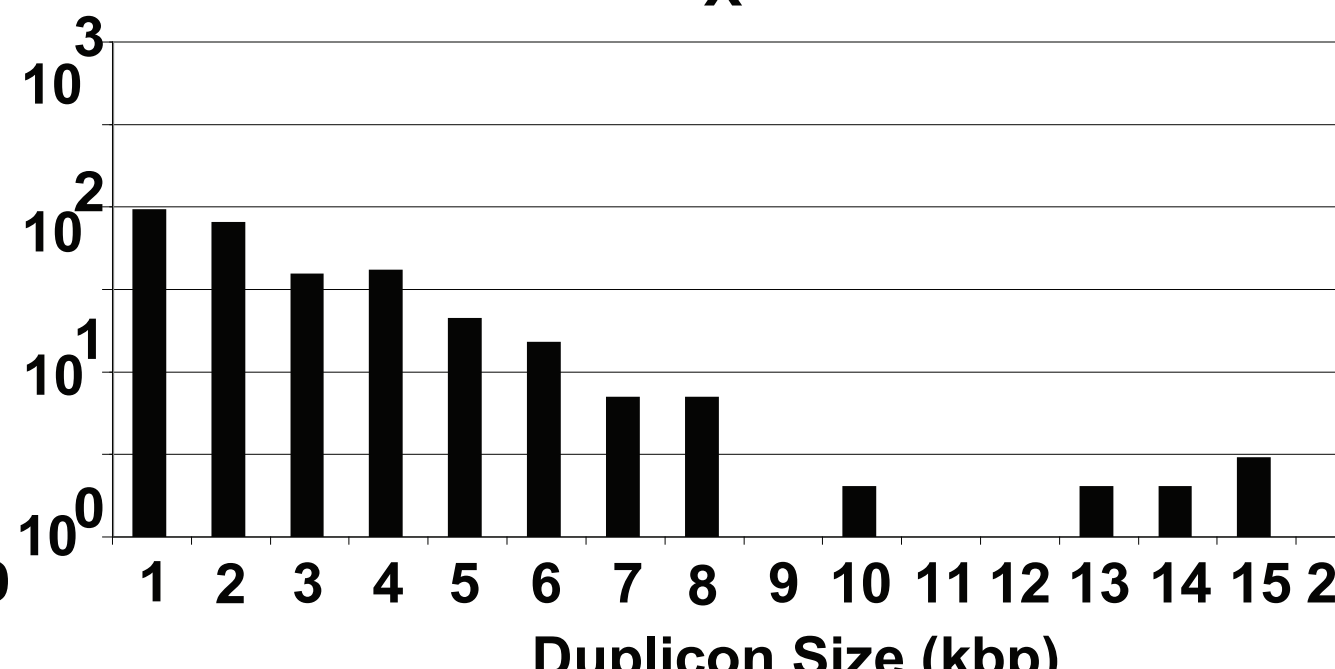

Supplement: 1471-2164-10-329-S2.pdf [file 1471-2164-10-329-S2.pdf]
