# Supplementary material for: Polymorphic segmental duplication in the nematode Caenorhabditis elegans
Source: PubMed Central journal article supplement (PMC2728738; doi:10.1186/1471-2164-10-329), 2009-07-21

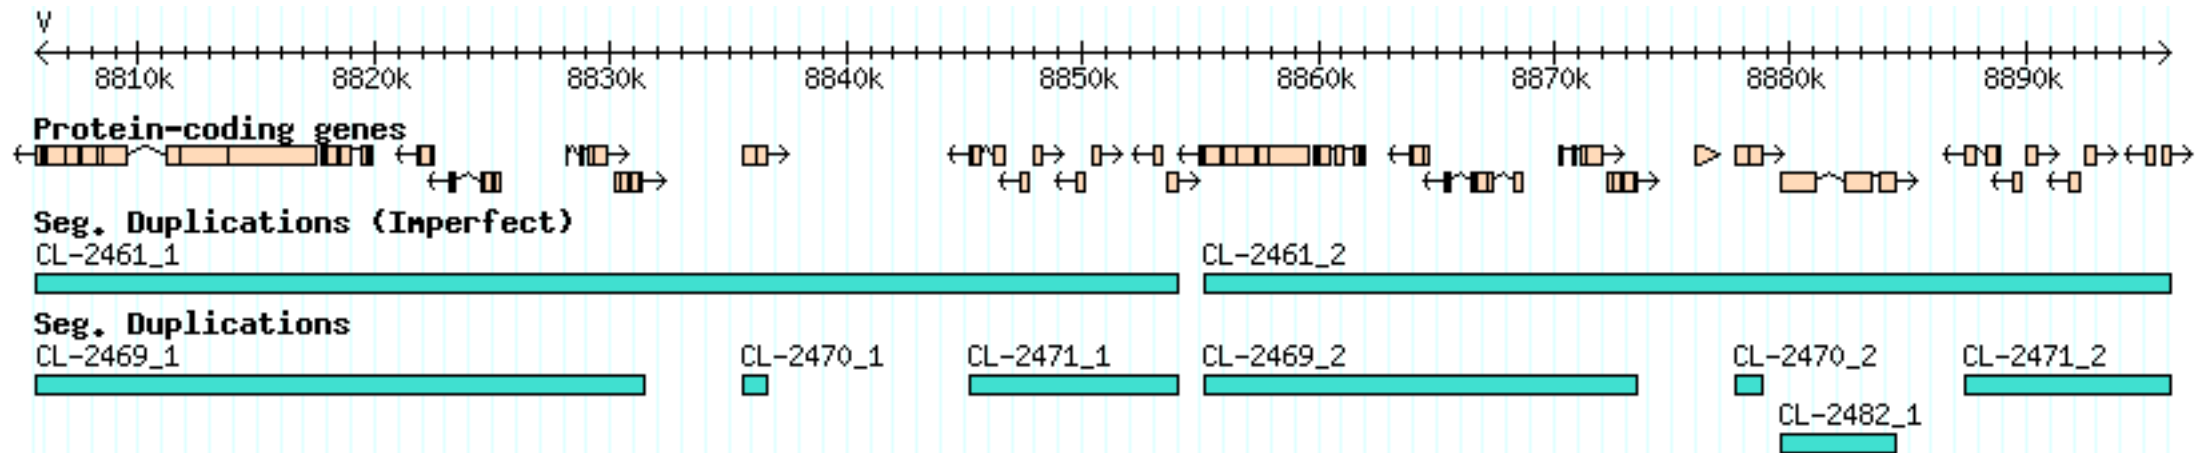

Supplement: 1471-2164-10-329-S3.pdf [file 1471-2164-10-329-S3.pdf]
